# Supplementary material for: Oxalatocuprate(ii) hexaammincobalt(iii) as a precursor of metastable solid solutions in the Co–Cu system
Source: Royal Society of Chemistry journal article supplement (doi:10.1039/d3nj05311c), 2024-01-01
Supplement: d3nj05311c1.pdf [file d3nj05311c1.pdf]

## Oxalatocuprate(II) hexaammincobalt(III) as a precursor of metastable solid solutions in the Co-Cu system

Varvara Lagunova,<sup>\*a</sup> Pavel Rubilkin,<sup>a,b</sup> Evgeny Filatov,<sup>a</sup> Pavel Plyusnin,<sup>a</sup> Natalia Kuratiev<sup>a</sup> and Sergey Korenev<sup>a</sup>

<sup>a</sup> *Nikolaev Institute of Inorganic Chemistry SB RAS, 3, Acad. Lavrentiev Ave., Novosibirsk, 630090, Russia. E-mail: varvara@niic.nsc.ru*

<sup>b</sup> *Novosibirsk State University, Pirogova St., 2, Novosibirsk, 630090, Russia*

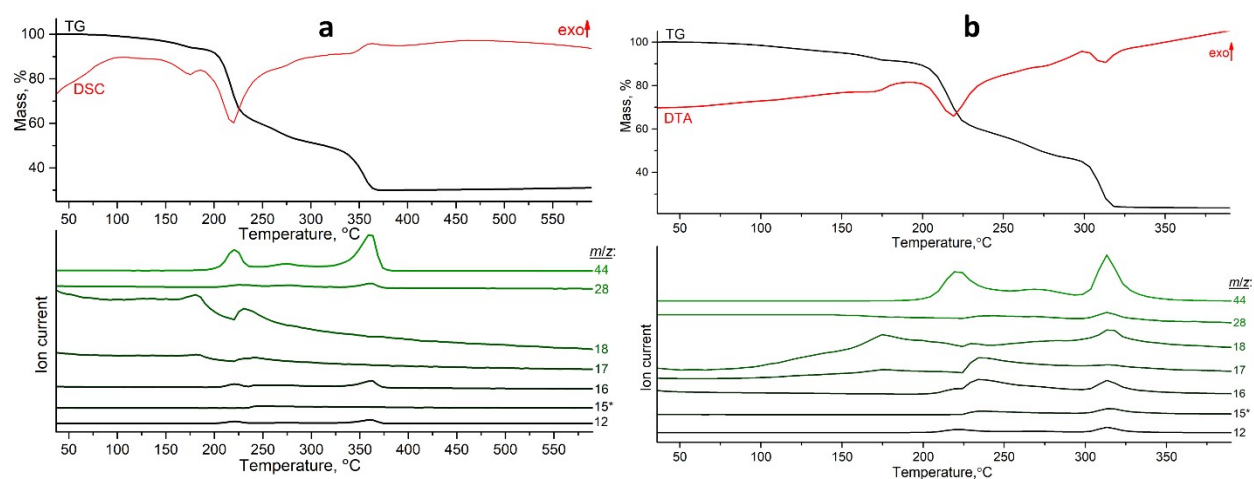

**Fig. S1.** STA and EGA-MS curves for  $[\text{Co}(\text{NH}_3)_6]_2[\text{Cu}(\text{C}_2\text{O}_4)_2]_3 \cdot 4\text{H}_2\text{O}$  in an argon (a) and hydrogen (b) atmosphere, 10 K/min. 15\* – data for  $m/z=15$  was increased for better visualization.

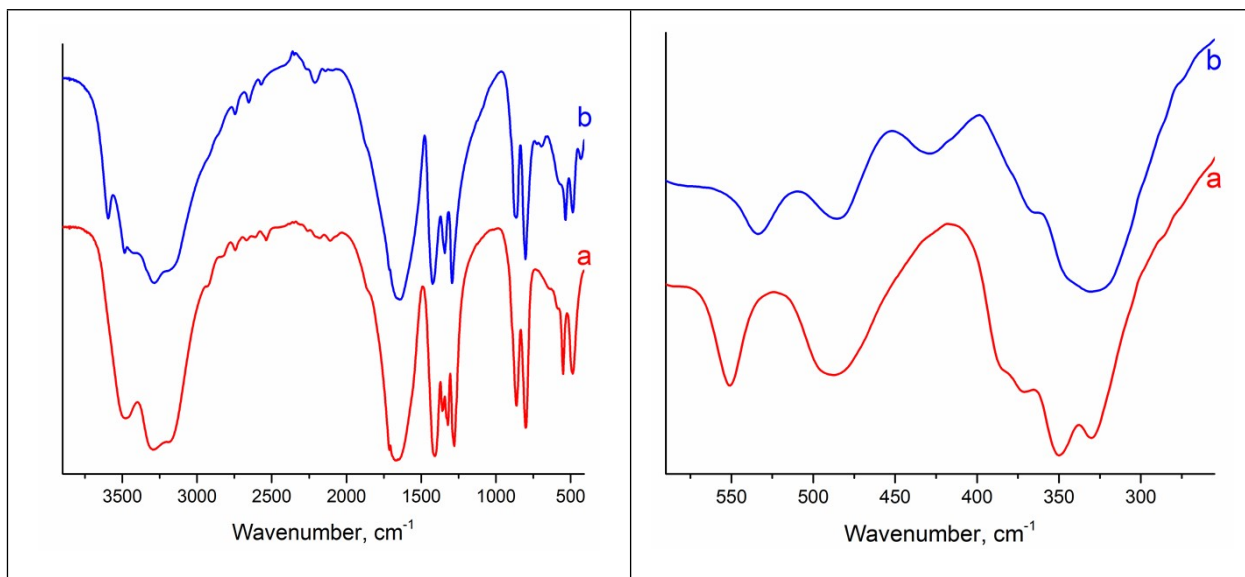

**Fig. S2.** IR spectra of  $[\text{Co}(\text{NH}_3)_6]_2[\text{Cu}(\text{C}_2\text{O}_4)_2]_3 \cdot 4\text{H}_2\text{O}$  (a) and  $[\text{Co}(\text{NH}_3)_6]_2[\text{Cu}(\text{C}_2\text{O}_4)_2]_3 \cdot 6\text{H}_2\text{O}$  (b).

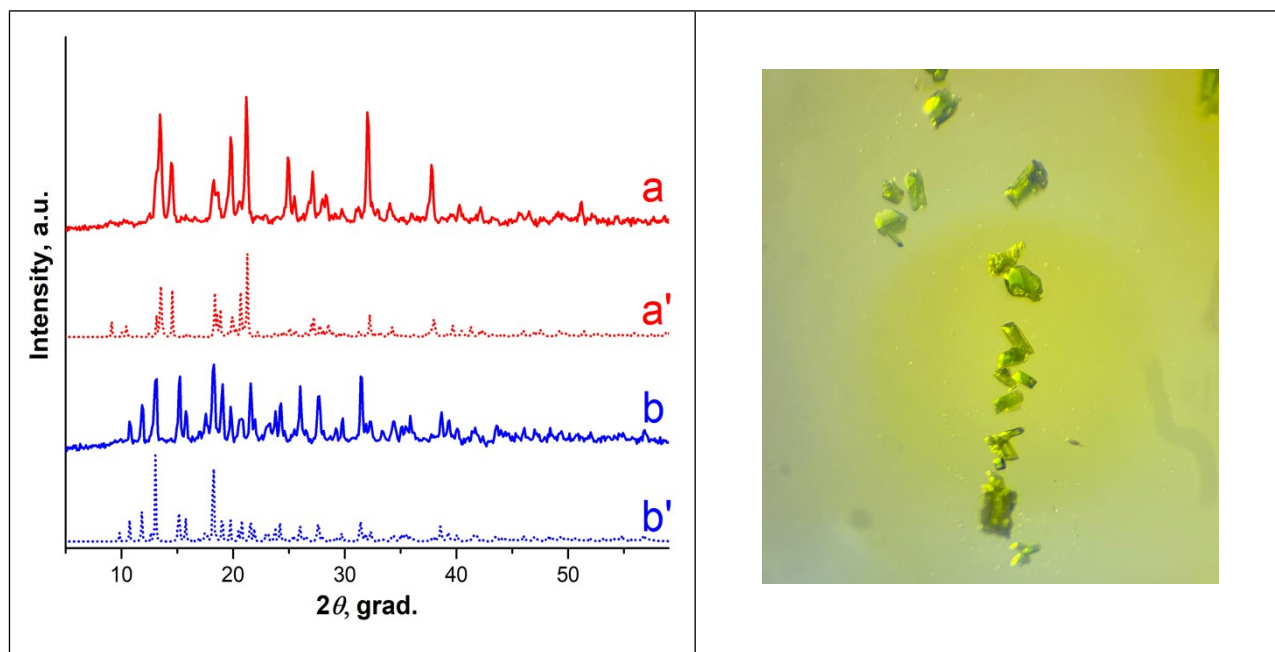

**Fig. S3.** XRD pattern obtained from the single-crystal data (a' –  $[\text{Co}(\text{NH}_3)_6]_2[\text{Cu}(\text{C}_2\text{O}_4)_2]_3 \cdot 4\text{H}_2\text{O}$ , b' –  $[\text{Co}(\text{NH}_3)_6]_2[\text{Cu}(\text{C}_2\text{O}_4)_2]_3 \cdot 6\text{H}_2\text{O}$ ) as compared with the powder XRD patterns (a –  $[\text{Co}(\text{NH}_3)_6]_2[\text{Cu}(\text{C}_2\text{O}_4)_2]_3 \cdot 4\text{H}_2\text{O}$ , b –  $[\text{Co}(\text{NH}_3)_6]_2[\text{Cu}(\text{C}_2\text{O}_4)_2]_3 \cdot 6\text{H}_2\text{O}$ ) (left). A photograph of the crystallites of  $[\text{Co}(\text{NH}_3)_6]_2[\text{Cu}(\text{C}_2\text{O}_4)_2]_3 \cdot 6\text{H}_2\text{O}$  (right).

According to UV-Vis spectroscopy, the spectra show three absorption peaks each at 340 nm, 470 nm and 649 nm for  $[\text{Co}(\text{NH}_3)_6]_2[\text{Cu}(\text{C}_2\text{O}_4)_2]_3 \cdot 4\text{H}_2\text{O}$  and at 340 nm, 470 nm and 715 nm for  $[\text{Co}(\text{NH}_3)_6]_2[\text{Cu}(\text{C}_2\text{O}_4)_2]_3 \cdot 6\text{H}_2\text{O}$  (Fig. S3, ESI). Since the first two absorption maximum of the both DCSs coincides, we assume that it relates to the d-d transitions of  $\text{Co}^{3+}$ . This assumption is also supported by the literature data.<sup>1</sup> And the third absorption peak relates to the d-d transitions of  $\text{Cu}^{2+}$ . The shift of the absorption maximum of the second peak for  $[\text{Co}(\text{NH}_3)_6]_2[\text{Cu}(\text{C}_2\text{O}_4)_2]_3 \cdot 6\text{H}_2\text{O}$  can be explained by the large number of water molecules in the coordination sphere of Cu.

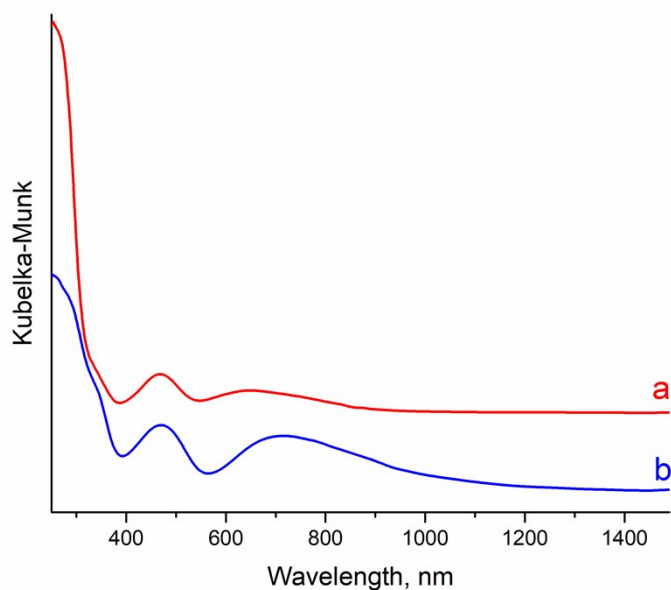

**Fig. S4.** The absorbance spectra of  $[\text{Co}(\text{NH}_3)_6]_2[\text{Cu}(\text{C}_2\text{O}_4)_2]_3 \cdot 4\text{H}_2\text{O}$  (a) and  $[\text{Co}(\text{NH}_3)_6]_2[\text{Cu}(\text{C}_2\text{O}_4)_2]_3 \cdot 6\text{H}_2\text{O}$  (b).

<sup>1</sup> A. R. Sotiles, F. Massarotti, J. C. de Oliveira Pires, M. E. F. Ciceri and C. R. B. Parabocz, *Orbital*, 2019, **11**, 348.
